1 Environmentally-induced DNA methylation is inherited across generations in an  
2 aquatic keystone species (*Daphnia magna*)  
3

4 Nathalie Feiner<sup>1\*</sup>, Reinder Radersma<sup>1,2</sup>, Louella Vasquez<sup>3</sup>, Markus Ringnér<sup>4</sup>, Björn Nystedt<sup>5</sup>,  
5 Amanda Raine<sup>6</sup>, Elmar W. Tobi<sup>7,8,9</sup>, Bastiaan T. Heijmans<sup>9</sup> & Tobias Uller<sup>1\*</sup>  
6

7 <sup>1</sup>Department of Biology, Lund University, Lund, Sweden

8 <sup>2</sup>Centrum Wiskunde & Informatica, Amsterdam, The Netherlands

9 <sup>3</sup>Department of Laboratory Medicine, National Bioinformatics Infrastructure Sweden,  
10 Science for Life Laboratory, Lund University, Lund, Sweden

11 <sup>4</sup>Department of Biology, National Bioinformatics Infrastructure Sweden, Science for Life  
12 Laboratory, Lund University, Lund, Sweden

13 <sup>5</sup>Department of Cell and Molecular Biology, National Bioinformatics Infrastructure Sweden,  
14 Science for Life Laboratory, Uppsala University, Uppsala, Sweden

15 <sup>6</sup>Department of Medical Sciences, Science for Life Laboratory, Uppsala University, Uppsala,  
16 Sweden

17 <sup>7</sup>Periconceptional Epidemiology, Department of Obstetrics and Gynaecology, Division of  
18 Obstetrics and Prenatal Medicine, Erasmus MC, University Medical Center, Rotterdam, The  
19 Netherlands

20 <sup>8</sup>Division of Human Nutrition and Health, Department of Agrotechnology and Food Science,  
21 Wageningen University & Research, Wageningen, the Netherlands

22 <sup>9</sup>Molecular Epidemiology, Department of Biomedical Data Sciences, Leiden University  
23 Medical Center, Leiden, The Netherlands  
24

25 \*Corresponding authors: [nathalie.feiner@biol.lu.se](mailto:nathalie.feiner@biol.lu.se) and [tobias.uller@biol.lu.se](mailto:tobias.uller@biol.lu.se)

26 **Key words:**

27 epigenetics, extra-genetic inheritance, transgenerational plasticity, maternal effects, whole-

28 genome bisulfite sequencing, stress response, crustacean;

29

30 **Short title:**

31 Transgenerational inheritance of naturally-induced epigenetic marks

32 **Abstract**

33 Environmental stress can result in epigenetic modifications that are passed down several  
34 generations. Such epigenetic inheritance can have significant impact on eco-evolutionary  
35 dynamics, but the phenomenon remains controversial in ecological model systems. Here, we  
36 used whole-genome bisulfite sequencing on individual water fleas (*Daphnia magna*) to assess  
37 whether environmentally-induced DNA methylation can persist for up to four generations.  
38 Genetically identical females were exposed to a control treatment, one of three natural  
39 stressors (high temperature, zinc, microcystin), or the methylation-inhibitor 5-azacytidine.  
40 After exposure, lines were propagated clonally for four generations under control conditions.  
41 We identified between 70 and 225 differentially methylated CpG positions (DMPs) between  
42 controls and F1 individuals whose mothers (and therefore they themselves as germ cells)  
43 were exposed to one of the three natural stressors. Between 46% and 58% of these  
44 environmentally-induced DMPs persisted until generation F4 without attenuation in their  
45 magnitude of differential methylation. DMPs were enriched in exons and largely stressor-  
46 specific, suggesting a possible role in environment-dependent gene regulation. In contrast,  
47 treatment with the compound 5-azacytidine demonstrated that pervasive hypo-methylation  
48 upon exposure is reset almost completely after a single generation. These results suggest that  
49 environmentally-induced DNA methylation is non-random and stably inherited across  
50 generations in *Daphnia*, making epigenetic inheritance a putative factor in the eco-  
51 evolutionary dynamics of fresh-water communities.

52

53 **Author summary**

54 Water fleas are important keystone species mediating eco-evolutionary dynamics in lakes and  
55 ponds. It is currently an open question in how far epigenetic inheritance contributes to the  
56 ability of *Daphnia* populations to adapt to environmental stress. Using a range of naturally

57 occurring stressors and a multi-generational design, we show that environmentally-induced  
58 DNA methylation variants are stably inherited for at least four generations in *Daphnia*  
59 *magna*. The induced variation in DNA methylation are stressor-specific and almost  
60 exclusively found in exons, bearing the signatures of functional adaptations. Our findings  
61 imply that ecological adaptations of *Daphnia* to seasonal fluctuations can be underpinned by  
62 epigenetic inheritance of DNA methylation without changes in gene frequencies.

## 63 **Introduction**

64 Environmental stress can cause systemic changes in development and physiology. Such  
65 changes have been shown to occasionally span several generations [e.g., 1, 2, 3]. Many of the  
66 responses involve changes in the molecular machinery that is associated with DNA and  
67 contributes to gene regulation. DNA methylation is one of the most well studied epigenetic  
68 mechanisms in this context, but its involvement in transgenerational effects remains  
69 controversial in animals [4-7]. In mammals, inheritance of environmentally induced DNA  
70 methylation is limited by the fact that epigenetic marks are typically reset during  
71 reproduction [8-10], and this may explain why transgenerational persistence of  
72 environmentally induced DNA methylation appears rather uncommon [5]. In invertebrates,  
73 the transgenerational persistence of stochastic or environmentally induced DNA methylation  
74 variation is poorly studied. This is partly because DNA methylation is of limited significance  
75 in traditional model systems [e.g., *Drosophila*; 11]. However, recent studies suggest that  
76 environmentally induced variation in DNA methylation can be passed on to subsequent  
77 generations in insects, and perhaps other invertebrates as well [12-14].

78 Water fleas of the genus *Daphnia* are common in lakes and ponds, where they play  
79 central roles in the functioning of ecological interactions, food webs, and nutrient cycling  
80 [15]. How *Daphnia* respond to environmental change can have strong impact on community  
81 and ecosystem dynamics, making *Daphnia* a model system to understand the interactions  
82 between phenotypic plasticity, adaptive evolution, and ecology on contemporary time scales  
83 [16]. Such eco-evolutionary dynamics may be fundamentally altered if environmentally  
84 induced responses are inherited, for example, via epigenetic mechanisms [17]. However, the  
85 extent and specificity of transgenerational persistence of environmentally induced epigenetic  
86 variation remains poorly understood, not only in *Daphnia* but in ecological model systems in  
87 general [18, 19].

88           In addition to its role as a keystone species, there are several others reasons why  
89 *Daphnia* is particularly useful to study epigenetic inheritance. Individuals frequently  
90 reproduce clonally, which makes it possible to study epigenetic inheritance without the  
91 confounding effects of genetic variation [20, 21]. Furthermore, *Daphnia* inhabit waters with  
92 seasonal environmental variation, spanning periods of multiple asexual generations, a  
93 situation that should favour incomplete epigenetic resetting [22-24]. Thus, *Daphnia* may be  
94 particularly likely to have evolved mechanisms that enable context- and gene-specific  
95 inheritance of gene regulation. Since *Daphnia* are carrying their offspring in an actively  
96 ventilated brood pouch, maternal exposure to environmental stressors can have effects on  
97 future generations by directly affecting embryos or germ cells, similar to the situation in  
98 mammals. Such effects on offspring phenotype and fitness are commonly observed and  
99 occasionally carry over to more than two generations (e.g., UV [25], microcystin [26],  
100 temperature [27], and predator cues [28]). A candidate epigenetic mechanism underlying  
101 transgenerational plasticity in *Daphnia* is DNA methylation. Despite that DNA methylation  
102 in water fleas is occurring at low levels [ $\sim 0.6\%$ ; 29, 30], it is typically enriched in exons and  
103 is positively correlated with levels of gene expression [29]. There is also some evidence that  
104 environmentally induced variation in DNA methylation can be passed on to subsequent  
105 generations [31-33]. However, a rigorous assessment of genome-wide patterns of inheritance  
106 on the individual level has not been performed to date.

107           In this study, we chose four stressors that have been shown to affect global DNA  
108 methylation. Three are stressors that *Daphnia* encounter in the wild (*Microcystis aeruginosa*,  
109 a cyanobacteria producing the toxin microcystin, zinc, and elevated temperature) and one is a  
110 toxin not naturally encountered by *Daphnia* (5-azacytidine, a compound that inhibits the  
111 function of the DNA methyltransferase DNMT1 and thereby causes hypo-methylation [34]).  
112 Using a multi-generational experimental design (Figure 1), we explored (1) the immediate

113 impact of the stressors on genome-wide DNA methylation levels in F1 individuals, which  
114 were germ cells during maternal exposure, by identifying differentially methylated cytosine  
115 positions (DMPs), (2) whether these DMPs are specific for each stressor, (3) whether DMPs  
116 persist across four generations and (4) the putative biological function of these DMPs.

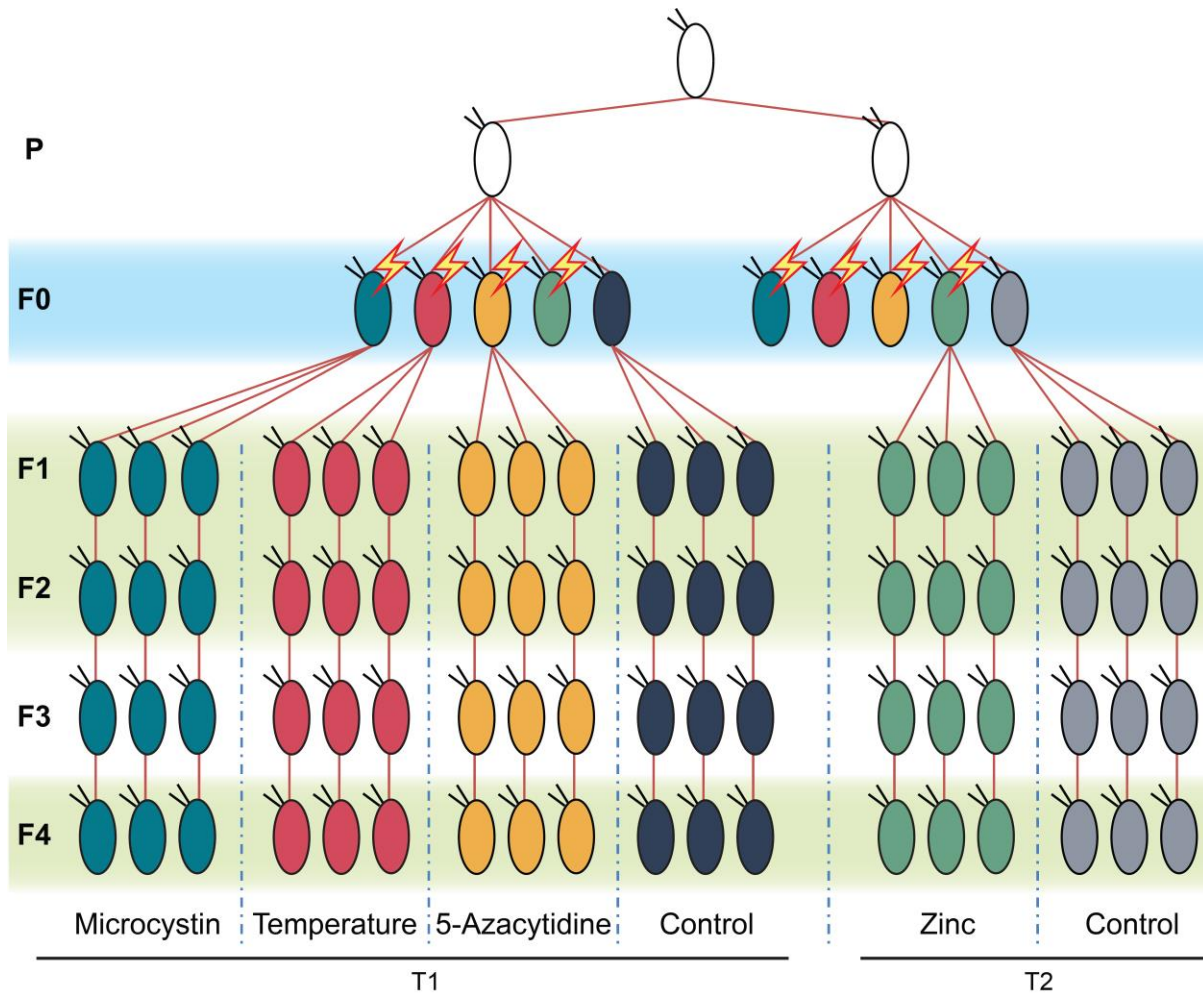

117  
118 **Figure 1.** Schematic representation of the experimental design. Clonal siblings (generation P) were  
119 divided into two lines (experiment T1 and T2) and their offspring (F0) were exposed to environmental  
120 stressors (microcystin, high temperature, 5-azacytidine, or zinc) or kept under control conditions (one  
121 per line). This experiment was replicated twice (T1 and T2) and run in parallel to account for potential  
122 incompleteness due to the extinction of maternal lines. The most complete experiment for each  
123 stressor was subjected to further analyses (as indicated, mortality in the zinc-exposed line resulted in  
124 incomplete data and the analyses for zinc therefore make use of data from the second experiment).  
125 Individual *Daphnia* of the generation F0 were exposed to environmental stressors from birth to first

126 reproduction (more detail in Table S1). Since the maternal treatment stopped before the egg cells were  
127 released into the brood pouch, the F1 generation was exposed as germ cells to the stressors but not as  
128 embryos. Five offspring per exposed (or control) mother were selected and allowed to propagate until  
129 generation F4 under control conditions. Red lines represent propagation of second brood offspring.  
130 Individual *Daphnia* of each treatment group and generation F1, F2 and F4 were subjected to whole-  
131 genome bisulfite sequencing (indicated by light green boxes). Each experimental unit included in the  
132 final analysis consisted of three individuals, except for T1-5-azacytidine-F1 and T1-Control-F4,  
133 which consisted of two replicate individuals, and T2-control-F1 and T1-control-F2, which consisted  
134 of four replicate individuals. Tests of transgenerational persistence of environmentally induced DNA  
135 methylation were analysed separately for T1 and T2. For more details, see Methods and Tables S1  
136 and S2.

137

## 138 **Results**

### 139 **Environmental stressors negatively affect the reproductive output of exposed *Daphnia***

140 Fitness assays on the reproductive output of individuals showed a direct effect on the  
141 stressor-exposed F0 generation relative to control samples for all stressors except elevated  
142 temperature (Figure 2). These negative fitness effects were most pronounced for *Daphnia*  
143 exposed to toxic cyanobacteria (microcystin treatment). However, this treatment line, as well  
144 as the zinc treatment line, regained reproductive fitness already in the F1 generation. The  
145 negative fitness effect of the 5-azacytidine treatment persisted until generation F3. Elevated  
146 temperature negatively affected reproductive fitness in generations F1 and F3 (Figure 2).  
147 Thus, the treatments significantly affected reproductive output of exposed individuals and  
148 caused maternal and transgenerational effects on fitness that demonstrate the physiological  
149 relevance of the stressors.



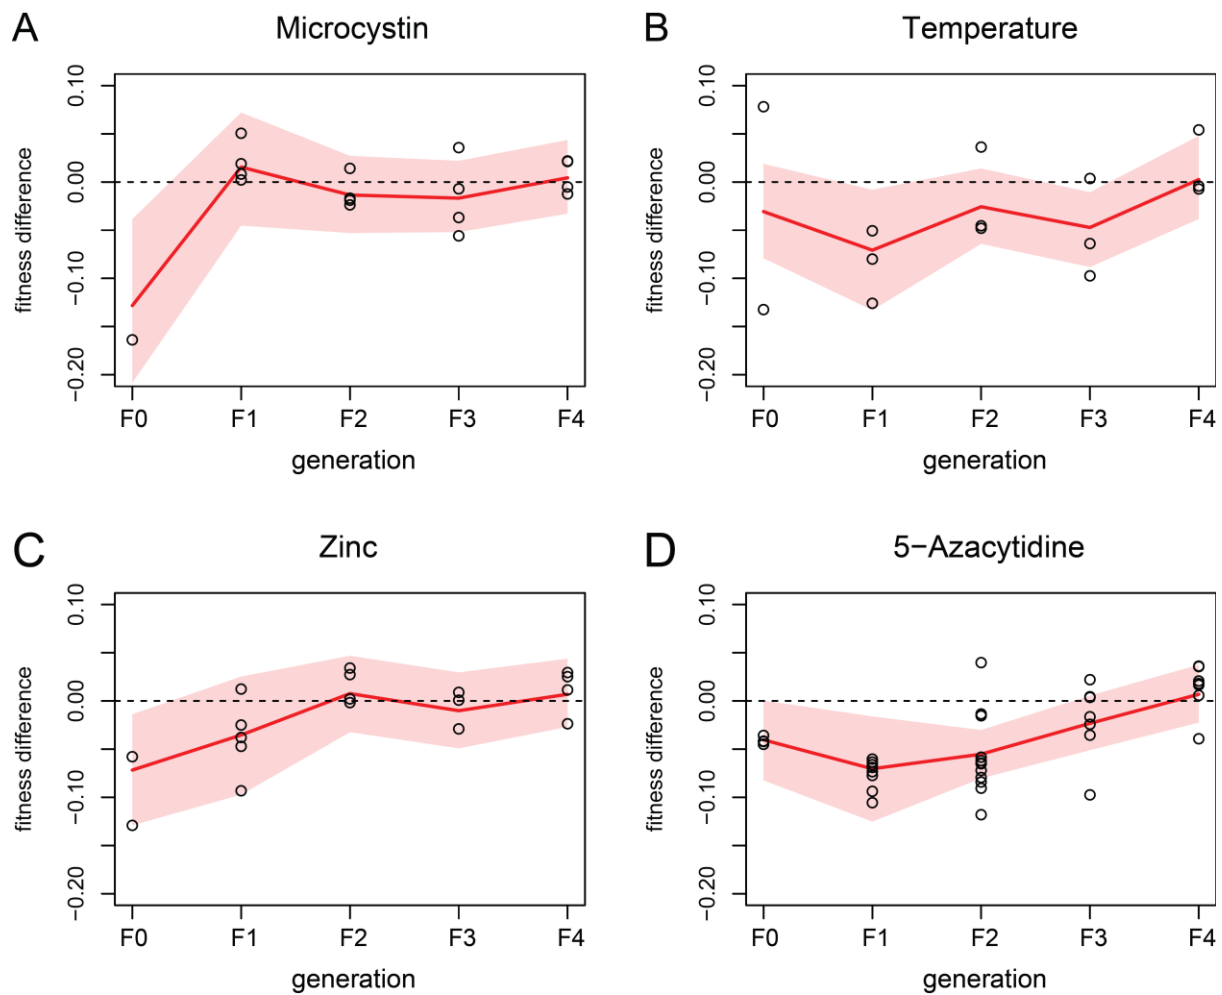

150

151 **Figure 2. Fitness effects of the environmental stressors.** (A-D) Each plot shows the fitness  
152 difference of exposed *Daphnia* per generation relative to the control conditions (marked as dashed  
153 line). Fitness estimates refer to lifetime reproductive output derived from the age at first and second  
154 reproduction and the size of the first and second brood (see Methods). Red lines mark the means and  
155 shaded areas the 95% credible intervals. Observed values (statistically corrected for clone line effects)  
156 are plotted as black circles. Note that fitness data was recorded for all individuals included in this  
157 study, including those not selected for bisulfite sequencing. For (D) 5-azacytidine the fitness effects  
158 were sustained until generation F2, whereas for (A) microcystin and (C) zinc the effects disappeared  
159 after generation F1. For (B) high temperature, fitness effects lasted for several generations (until  
160 generation F3), though fitness was significantly different from the control samples only for generation  
161 F1 and F3.

162

163 **Genome-wide methylation levels are consistently low and reduced by 5-azacytidine**

164 Consistent with previous studies in *D. magna* [0.74%; 29] [0.52%; 30], we found an overall  
165 low proportion of CpG sites in a methylated state (Figure 3). In control samples, 0.50% (SD:  
166 0.02%) of all CpG sites were methylated, and similar proportions were found in *Daphnia* that  
167 were exposed to one of the natural stressors (high temperature, zinc or microcystin) as germ  
168 cells (F1), and in their non-exposed descendants (F2 and F4). As expected, the stressor 5-  
169 azacytidine, which inhibits DNA methylation, caused a tenfold decrease in methylation levels  
170 of CpG sites in the generation F1 (0.05%; SD: 0.02%,  $P$ -value  $<0.01$ ) relative to control F1.  
171 Subsequent generations (F2 and F4) of 5-azacytidine exposed *Daphnia* showed CpG  
172 methylation levels that approached the levels of the control samples, but remained at a  
173 consistently lower level (Figure 3).

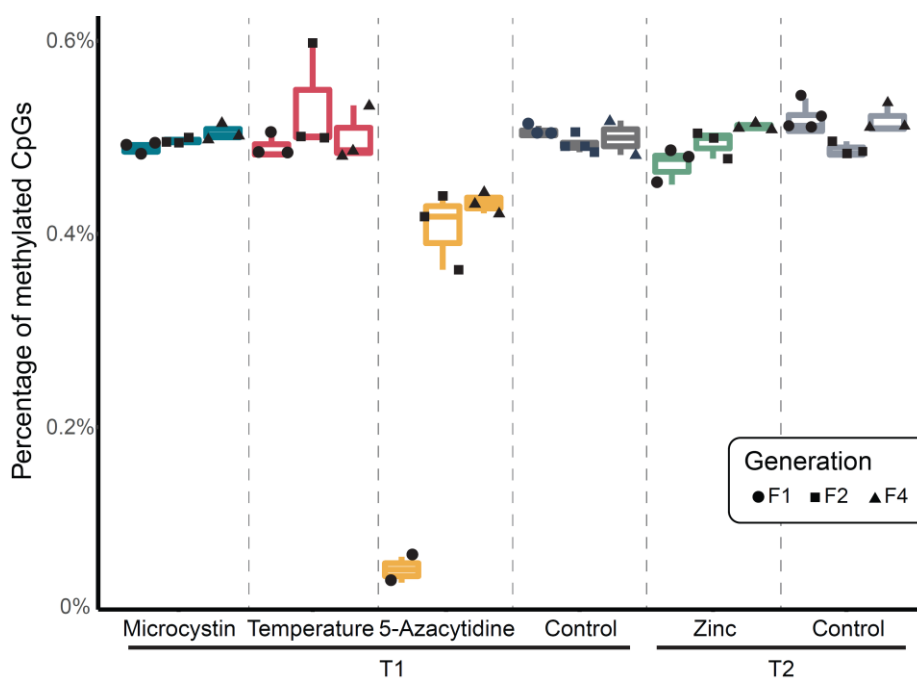

174 **Figure 3.** Overall levels of CpG methylation across samples. Plots show the percentages of CpGs that  
175 are methylated relative to the total number of CpGs in the genome for each treatment group. Boxes  
176 are coloured according to treatment group. The lower, median and upper hinges correspond to the  
177 first, second and third quartiles respectively. Whiskers indicate the range that lies within 1.5 times of  
178 the interquartile ranges. Black symbols indicate the individual data points according to generation.  
179

180

181 **Germ-cell exposure to environmental stressors leads to differential methylation of CpG**  
182 **sites**

183 We detected an effect on genome-wide patterns of methylation in individual F1 *Daphnia* that  
184 were exposed to natural stressors as germ cells. We identified 70 DMPs in the F1 generation  
185 exposed to thermal stress (relative to the nine control samples in the F1, F2 and F4  
186 generations), 76 DMPs in *Daphnia* exposed to zinc, and 225 DMPs in *Daphnia* exposed to  
187 microcystin (at 5% FDR; Tables S3-S5).

188 Consistent with the strong signal of demethylation through 5-azacytidine, we found  
189 2,231 DMPs in F1 *Daphnia* of this treatment line. While pairs of treatments shared a low  
190 number of DMPs (Table S6), we found no DMPs in F1 that were shared by all four stressor  
191 groups, and also no DMPs shared between the three natural stressors (thermal stress, zinc and  
192 microcystin). Thus, the induced methylation changes were largely stressor-specific.

193

194 **A large proportion of environmentally-induced DMPs persist until the F4 generation**

195 After calling DMPs for each stressor and for each generation (at 5% FDR), we intersected  
196 DMPs across generations per stressor to assess their overlap and thus the persistence of the  
197 stress response. For example, of the 225 DMPs detected in F1 *Daphnia* from the microcystin  
198 treatment, 57.8% (130 sites) were also differentially methylated compared to control samples  
199 in generation F2 and F4 (Figure 4A; Table S7). For zinc and temperature, 53.9% and 45.7%  
200 of the environmentally induced methylation variants in F1 persisted until the F4 generation  
201 (Tables S8 and S9). Across the natural stressors (high temperature, zinc or microcystin), the  
202 number of DMPs shared among three generations (F1, F2 and F4) was greater than expected  
203 by chance ( $P$ -value derived from 1000 permutations:  $<0.001$  for all three stressors), and also

204 greater than the number of DMPs unique to F2 or F4 (Figure 4A). These results demonstrate  
205 transgenerational stability of stress-induced methylation marks.

206 Since 5-azacytidine induced a strong hypomethylation in the F1 generation exposed  
207 as germ cells, followed by a re-methylation in following generations (Figure 3), the patterns  
208 of transgenerational inheritance were different from that of the other stressors (Figure 4B).  
209 Only 1% (26 sites) of the environmentally induced methylation variants in F1 persisted until  
210 the F4 generation, all of which remained hypomethylated (Figure 4A; Table S10). Thus,  
211 compared to the other three stressors, the number of DMPs within each generation were  
212 consistently higher, but their inter-generational overlap was lower.

213 To robustly verify that the treatment-induced transgenerational DMPs are stably  
214 persisting across generations and not due to stochastic events, we used two additional  
215 strategies for data analyses. Firstly, we applied permutations by randomly shuffling sample  
216 labels to generate a null hypothesis. These permutations demonstrated deflated  $P$ -values  
217 relative to the observed  $P$ -values (Figures S1 and S2) and produced no transgenerational  
218 DMPs except two in 100 permutations in the 5-azacytidine case. Secondly, to mitigate the  
219 potential bias stemming from using the same set of control samples (i.e., all nine control  
220 samples) in each statistical test, we used an alternative strategy that identified candidate  
221 DMPs in the F1 and subsequently tested the significance of those candidates in F2 and F4  
222 (for details and results, see Methods section). Both additional strategies broadly confirmed  
223 the existence of environmentally induced DMPs that persist for at least four generations.

224 Consistent with the limited overlap of DMPs of F1 *Daphnia* between the four  
225 stressors, we also found that transgenerational DMPs are largely stressor-specific. However,  
226 pairs of treatments (e.g., temperature and microcystin treatments) shared up to 7 DMPs,  
227 which was more than expected by chance ( $P$ -value derived from 1000 permutations:  $<0.001$ ;  
228 Figure 4C).

229

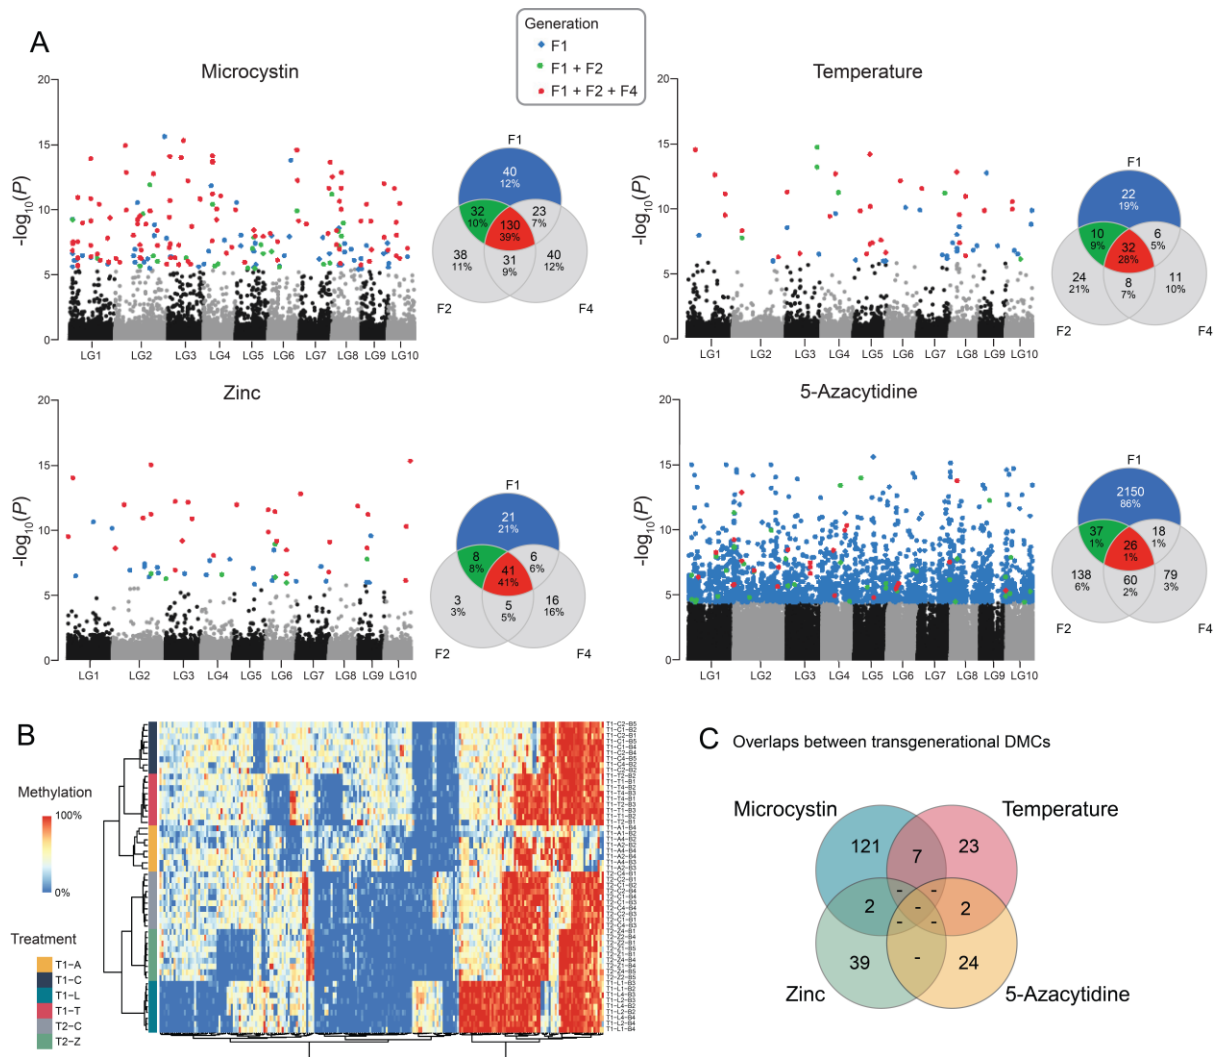

230

231

232

233

234

235

236

237

238

239

**Figure 4.** Transgenerational inheritance of DMPs. (A) Manhattan plots showing the genomic positions of DMPs (left) and Venn-diagrams showing the overlap of DMPs across generation F1, F2 and F4 (right) for each of the four stressors. DMPs are color-coded according to their transgenerational persistence as indicated. Numbers in the centre of the Venn-diagrams give the number of transgenerational DMPs. Percentages of all DMPs are provided below absolute numbers of DMPs in each group. (B) Heatmap of the methylation level for all 229 transgenerational DMPs across all samples included in this study. Label names consist of experiment (T1 or T2), treatment and generation (A, 5-azacytidine; L, microcystin; T, temperature; Z, zinc; followed by a number indicating the generation), and clonal line number (B1-B5). (C) Venn diagram presenting the overlap

240 of transgenerational DMPs across the treatments. No DMP was shared across three or all four  
241 treatments, but between two and seven are shared by two stressors.

242

243 **Transgenerational DMPs retain a consistent methylation pattern and are almost**  
244 **exclusively located in gene bodies**

245 For all transgenerational DMPs of a given stressor, the sign of differential methylation (i.e.,  
246 hypo- or hypermethylated) was consistent across the generations. Moreover, when comparing  
247 the effect sizes of differential methylation relative to control samples for a given stressors, we  
248 found that those observed in the F1 and in the F4 generation are remarkably similar in  
249 magnitude, and no sign of attenuation in the F4 generation was observed (Figure 5A).

250 To assign a putative functional role to the identified DMPs, we systematically  
251 characterized the genomic positions for two groups of DMPs: those that occurred in the F1  
252 generation after developmental exposure (as germ cell) to a stressor (direct DMPs) and a  
253 subset of these, namely those that were stably inherited until generation F4 (transgenerational  
254 DMPs). We found that both direct and transgenerational DMPs are predominantly found in  
255 gene bodies (direct: 96.1%; transgenerational: 98.7%; Tables S3-S10, Figure 5B). Of all  
256 DMPs occurring in gene bodies, the majority lies in exons rather than introns (direct: 87.70%;  
257 transgenerational: 85.81%; Tables S3-S10, Figure 5B). Roughly half of the DMP-containing  
258 gene bodies contained at least two DMPs (direct: 54%; transgenerational: 42%) in close  
259 proximity to each other (median distance in bp, direct: 17; transgenerational, 1).

260

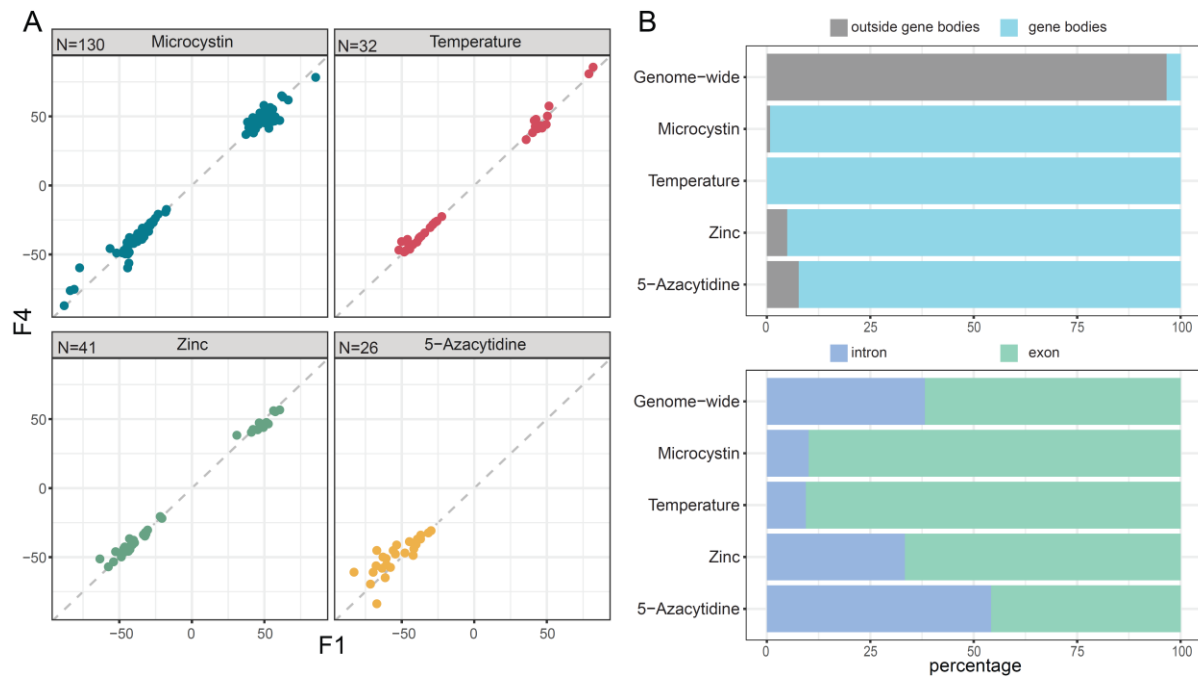

261

262 **Figure 5.** Characterization of transgenerational DMPs. (A) Effect sizes of the strength of differential  
263 methylation (methylation difference relative to the nine control samples) for the transgenerational  
264 DMPs of the F1 generation plotted against the corresponding effect sizes for the F4 generation. All  
265 DMPs lie close to the dashed line indicating equally strong effect sizes in the two generations, which  
266 shows that the effect sizes are consistent across generations. Note that all effect sizes for 5-azacytidine  
267 are negative, as expected, due to the hypomethylation caused by this compound. (B) Top panel shows  
268 the proportion of transgenerational DMPs that lie within gene bodies, and bottom panel further details  
269 the distribution of those to exons or introns. The comparison with the distribution of genome-wide  
270 CpG sites (N = 10,806,885) shows that the stressor-induced transgenerational DMPs are  
271 overrepresented in gene bodies, and tend to lie in exons rather than introns, except for the stressor 5-  
272 azacytidine.

273

### 274 **Transgenerational DMPs are occurring in genes that exhibit stressor-specific functions**

275 Although we did not find any overlap in the exact genes containing transgenerational DMPs  
276 induced by different stressors, members of the 60S (large) ribosomal protein family are  
277 consistently hypomethylated following exposure to a natural stressor (temperature, zinc or  
278 microcystin). A more systematic assessment of functional overlap using GO enrichment

279 analysis showed that transgenerational DMPs were significantly enriched for a number of  
 280 different functions. We found between 7 and 15 significant GO terms of biological processes  
 281 and the top ten of these terms are shown in Figure 6. None of the GO terms were shared  
 282 between two or more stressors (Tables S11 and S12). This shows that DMPs are largely  
 283 occurring in different sets of genes for each stressor, and that these genes show no functional  
 284 similarity (i.e., not the same GO terms).

285

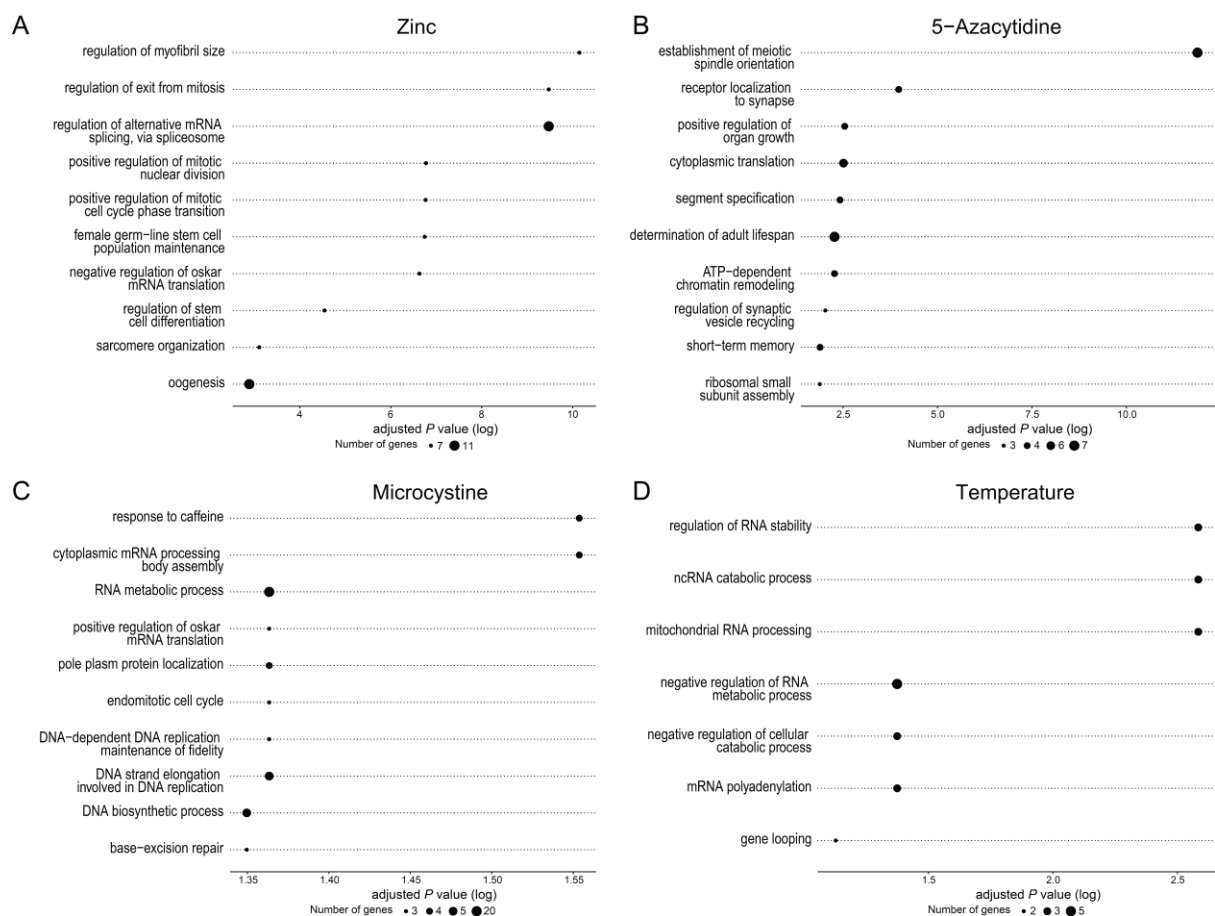

286

287 **Figure 6.** Putative functional role of transgenerational DMPs. (A-D) Top ten significantly enriched  
 288 GO terms of biological processes for genes containing transgenerationally inherited DMPs across the  
 289 four stressors. The size of each GO term represents the number of genes that it is represented by, and  
 290 the position along the x-axis indicates its significance (log-transformed adjusted *P*-value).

291



292 **Candidate genes for stress responses reported in the literature are not differentially**  
293 **methylated**

294 Finally, we cross-referenced genes identified as differentially methylated in our study with  
295 genes identified as differentially expressed upon stress exposure reported in the literature. We  
296 retrieved six studies that assessed gene expression differences in response to stressor  
297 exposure in *Daphnia sp.* We only included experimental designs that are comparable to the  
298 treatment conditions applied in our study, and that used genome-wide, unbiased approaches  
299 such as microarrays (four studies) or RNA-sequencing (two studies; Tables S13 and S14).  
300 Three of these studies used microcystin as stressor [35-37], two used zinc [38, 39], and one  
301 used temperature [40]. Between 6% and 15% of the key genes differentially expressed in  
302 response to microcystin, zinc, or temperature as stressor are highly functionally similar to  
303 genes identified as differentially methylated in our data, though gene identity was not  
304 identical (Tables S13 and S14). Most instances of genes identified as differentially expressed  
305 as well as differentially methylated concern genes with a well-described, broad functionality  
306 such as heat shock proteins or large ribosomal proteins (Tables S13 and S14).

307 The effects of 5-azacytidine on gene expression has not been assessed in a genome-  
308 wide, unbiased approach in *Daphnia*, but two studies reported the differential expression of  
309 several candidate genes (mostly DNA-methyltransferases, which are known to be the target  
310 of this drug) [41, 42]. We found that none of the key candidate genes differentially expressed  
311 in response to 5-azacytidine treatment was identified as differentially methylated in our  
312 analyses.

313

314 **Discussion**

315 Despite extensive interest in epigenetic inheritance, the extent to which environmentally  
316 induced epigenetic marks are heritable in animals remains an open question. Here, we show

317 that, in *Daphnia*, environmentally induced variation in DNA methylation in germ cells are  
318 specific to the stressor, and are stably inherited for at least four generations.

319 Maternal exposure to the natural stressors microcystin, zinc, and high temperature  
320 caused stressor-specific DNA methylation changes in their F1 offspring. Since the maternal  
321 treatment stopped before the egg cells were released into the brood pouch, the DMPs in F1  
322 were likely induced in germ cells and persisted during cell differentiation to be evident in  
323 most, or all, cell types (and thus possible to detect by bisulfite sequencing of whole  
324 individuals; although differences in the relative number of cell types between treatments may  
325 also contribute). As expected, 5-azacytidine led to genome-wide hypomethylation, while the  
326 other stressors induced both hypo- and hypermethylation. One of the two genes that were  
327 affected in all three of the naturally occurring stressors – microcystin, zinc, and high  
328 temperature – was a 60S (large) ribosomal protein, which was consistently hypomethylated.  
329 Large ribosomal proteins have been repeatedly reported as being implemented in stress  
330 responses of a variety of organisms [43, 44], including salinity stress in *Daphnia* [32].  
331 However, in general, the specific DMPs, the genes they reside in, and the putative functions  
332 of those genes (i.e., GO terms) were largely specific to each stressor.

333 The majority of environmentally induced DMPs were located in gene bodies, more  
334 precisely in exons, which is consistent with how DNA methylation appears to regulate gene  
335 expression in invertebrates [45, 46]. Indeed, some genes with DMPs do have putative  
336 functions for responding to these stressors, but few of the *a priori* candidate genes or  
337 pathways were identified as being differentially methylated. For example, DNA-  
338 methyltransferases, which are strongly down-regulated upon exposure to 5-azacytidine [41,  
339 42], showed no signs of changes in methylation levels. Similarly, ABC transporter genes and  
340 nucleoside transporters, which are strongly expressed in response to microcystin [36] and  
341 zinc [38], respectively, were not differentially methylated. This might be explained by the

342 fact that the differential expression of these candidate genes tends to be restricted to particular  
343 tissues (e.g., gut cells), and our whole-body measurements might not have been sensitive  
344 enough to pick up these subtle effects on the level of DNA methylation in specific tissues. In  
345 contrast, genes that appear to be both differentially expressed and differentially methylated  
346 were those with a rather general function, such as heat shock proteins and large ribosomal  
347 proteins. Genes encoding these proteins might perhaps show a more consistent expression  
348 across a range of cell types. Further analysis of DNA methylation in germ cells and  
349 differentiated cell types, and data on the relationship between DNA methylation and gene  
350 expression, could substantiate the breadth and stressor-specificity of DMPs in germ cells,  
351 their persistence during somatic cell differentiation, and functional relevance.

352         The epigenetic changes induced in offspring of exposed mothers commonly persisted  
353 until at least the fourth generation. The exception was the 5-azacytidin treatment, which  
354 demonstrates that modification of DNA methylation typically is restored from one generation  
355 to the next. Overall, only about 1% of sites that became hypomethylated in offspring of 5-  
356 azacytidin-exposed mothers remained hypomethylated in the F4 generation. This epigenetic  
357 resetting makes it the more striking that nearly half of the DMPs observed in the offspring of  
358 mothers exposed to microcystin, zinc, or high temperature actually persisted until the F4  
359 generation. This suggests that naturally occurring stressors modify DNA methylation in a  
360 way that reliably allow those modifications to be passed on to subsequent generations in  
361 *Daphnia*. These results substantiate and extend previous work on pools of *Daphnia*  
362 individuals that indicated that methylation patterns induced upon salinity stress or gamma  
363 radiation can be detected until the F3 generation [32].

364         The mechanism by which DNA methylation is inherited remains poorly understood.  
365 Both direct copying of methylation states and involvement of small RNA molecules in RNA-  
366 directed DNA methylation [47] are potential mechanisms. MicroRNA expression in eggs of

367 *Daphnia* vary as a result of maternal stress, but there is no evidence that differences in the  
368 expression of these RNAs persist for several generations [48]. However, this does not rule out  
369 that other forms of small RNAs, such as piRNA or tsRNA, are involved. RNA-mediated  
370 mechanisms may make it more likely that environmentally induced variation in DNA  
371 methylation will be inherited also during sexual reproduction and through both parents. More  
372 generally, establishing the mechanisms of transgenerational persistence of variation in DNA  
373 methylation will help to understand the extent to which it represents a flexible mechanism of  
374 inheritance that can contribute to ecological and evolutionary dynamics.

375         Despite a high incidence of parthenogenesis, *Daphnia* are famous for their ability to  
376 adapt rapidly to environmental stressors, including to all three naturally occurring stressors of  
377 this study (e.g., toxic cyanobacteria [49]; metal pollution [50], and high temperature [51]).  
378 Interestingly, such adaptations can be rapidly lost if conditions improve [50]. Laboratory  
379 studies have also demonstrated strong environmentally induced maternal effects (e.g., toxic  
380 cyanobacteria [52]; metal pollution [53]; temperature [54]), sometimes persisting for several  
381 generations [27, 55, 56]). The persistence of environmentally induced DNA methylation from  
382 one generation to the next that we demonstrate here could partly contribute to such  
383 transgenerational effects, and suggests that low genetic diversity may not prevent *Daphnia*  
384 populations from responding to selection. Thus, our results suggest that epigenetic  
385 inheritance can contribute to the adaptability of *Daphnia*, allowing populations to persist  
386 even under rapid and severe environmental change.

387

## 388 **Materials and Methods**

### 389 *Daphnia* husbandry and experimental design

390 A stock of *Daphnia magna* was sourced from Lake Bysjön (surface area 10 ha, 55°40'32"N  
391 13°32'42"E) in Southern Sweden. Single clonal lines were kept under laboratory conditions

392 [52] and allowed to reproduce asexually for 12 months before the onset of the experiment.  
393 All experiments in this study used a single clone to minimize any genetic effects. Applying  
394 the experimental design shown in Figure 1, individual *Daphnia* of the generation F0 were  
395 exposed to environmental stressors from birth to first reproduction (more detail in Table S1).  
396 Since the maternal treatment stopped before the egg cells were released into the brood pouch,  
397 the F1 generation was exposed as germ cells to the stressors but not as embryos [57].  
398 Following the first brood, all individuals of the F0 generation were maintained under control  
399 conditions. We propagated these lines down to generation F4 by isolating five offspring from  
400 the second brood in each generation and keeping them under control conditions. Subsequent  
401 generations (F2, F3 and F4) did not encounter the stressors. We collected individuals of  
402 generations F1, F2 and F4 for whole-genome bisulfite sequencing directly after they  
403 produced their second brood (i.e., as adults). We omitted the F3 generation and used the F4  
404 generation instead to gain insights into truly transgenerational effects on DNA methylation.  
405 This experiment was performed twice simultaneously (T1 and T2), to account for potential  
406 incompleteness due to the extinction of maternal lines, and the most complete experiment for  
407 each stressor was subjected to further analyses. The experiment T1 for 5-azacytidine,  
408 microcystin and high temperature, and experiment T2 was selected for the zinc treatment.  
409 Controls were matched within each of these two experimental groups (i.e., the effects of zinc  
410 were evaluated against its corresponding T2 control line, and the effects of the other three  
411 treatments against the T1 control line). Previous analyses of DNA methylation in *Daphnia*  
412 have relied on pools of individuals [32, e.g., 58], but to avoid confounding effects, we applied  
413 a newly developed low input methodology [59] that allowed us to sequence individual  
414 *Daphnia*.  
415  
416 *Reproductive output as a proxy of fitness effects*

417 To assess how the stressor treatments affect the lifetime reproductive success of exposed  
418 individuals and their descendants, we collected the age of first and second reproduction (in  
419 days) and the sizes of the first and second brood for all individuals of the selected experiment  
420 (T1 or T2; including those individuals not selected for bisulfite sequencing). We estimated  
421 fitness by calculating, for each individual, the intrinsic rate of population increase  $r$  with a  
422 univariate root finding algorithm (*uniroot* in R) using the Euler equation [for details, see 52].  
423 To test whether fitness varied by treatment and generation we estimated fitness for each  
424 treatment by generation in a nested multilevel model, with generation nested within treatment  
425 (in Stan 2.21.0 accessed from R with rstan 2.21.2). We present fitness effects as the  
426 difference between the fitness for a particular treatment by generation and the fitness of the  
427 control treatment of the same generation (with negative effects indicating a reduction of  
428 fitness compared to the control).

429

#### 430 *WGBS, read mapping and extraction of methylation values*

431 DNA was extracted from whole individual *Daphnia* samples using the DNeasy blood and  
432 tissue kit (Qiagen<sup>TM</sup>, Valencia, CA, USA) and DNA concentrations were estimated using a  
433 Qubit Fluorometer (ThermoFisher Scientific). Three individuals per experimental unit were  
434 initially processed, but units containing samples with low DNA concentrations were  
435 supplemented with a fourth back-up sample (i.e., for some units, four rather than three  
436 samples were processed). Extracted DNA samples were subjected to library preparation using  
437 the SPLAT protocol [59] with minor modifications. Adapter oligos were modified at all the  
438 5'- and 3'-ends not involved in ligation to reduce adapter dimer formation. The following  
439 adapter oligos were used: 5'AmMC6/GACGTGTGCTCTTCCGATCTNNNNNN/3'AmMo,  
440 5'Phos/AGATCGGAAGAGCACACGTC/3'AmMo,  
441 5'AmMC6/ACACGACGCTCTTCCGATCT, and

442 5'AmMC6/NNNNNNAGATCGGAAGAGCGTCGTGT/3'AmMo. All oligos were  
443 purchased from IDT. Libraries were sequenced on six lanes of an Illumina HiSeqX  
444 instrument in randomized order. Sequencing data were processed within the framework of the  
445 nf-core methylseq workflow version 1.5 [60] (Figure S3). In summary, raw reads of 64 fastq  
446 files were trimmed of adapter sequences using Trim Galore! with default  
447 parameters. Trimmed reads were mapped to the *Daphnia magna* reference genome  
448 GCA\_003990815.1 [genome size: 123 Mb; 61] using Bismark [62] with the paired-end  
449 setting and with parameter settings “-q --score-min L,0,-0.2 --ignore-quals --no-mixed --no-  
450 discordant --dovetail --maxins 500 --directional”. Cytosine methylation from deduplicated  
451 sequence data was generated using bismark\_methylation\_extractor [62] with parameter  
452 settings “--ignore\_r2 2 --ignore\_3prime\_r2 2 --no\_overlap”.

453 Six libraries were excluded from the analyses due to low read mapping rate and  
454 cytosine site coverage (<15% mapping rate, <1X mean coverage and <5X median  
455 coverage). Furthermore, four libraries were excluded on the basis of being PCA outliers in  
456 CpG percent methylation. Of these outliers, three were characterised by high percentage of  
457 methylated CpG (>97% percentile of the remaining libraries), which were at levels similar to  
458 the six libraries excluded due to low read mapping rates. In total, 54 libraries passed the  
459 quality control and proceeded to further analyses. These libraries had a mean coverage of  
460 5.3X and a mean mapping rate of 48% (Table S2).

461

#### 462 *Differential methylation analysis*

463 The Bioconductor R package methylKit\_1.12.0 [63] was used to carry out differential  
464 methylation analysis comparing each treatment (case) against untreated (control) groups. For  
465 each case and control selection, we only consider CpG sites with a minimum of 5 total read  
466 counts in all samples in all F-generations. The read counts of all sites that passed this filter

467 were normalised by a library specific scaling factor as computed by a median coverage  
468 normalisation in methylKit. Furthermore, sites were filtered to consider only variable sites  
469 with sample standard deviations in percent methylation values of  $\geq 0.5$  (per case-vs-control  
470 group; see below). Overall, the initial set of  $>8$  M CpG sites called per sample was reduced to  
471 an average of 2.8 M sites (range from 2.3-3.3 M) that were tested for differential methylation  
472 analysis.

473         Within the methylKit framework, we used the Wald test for hypothesis testing and  
474 beta binomial with overdispersion correction and parameter shrinkage to model the  
475 proportion of methylated CpG at a site. We quantitatively confirmed the main results using  
476 logistic regression models (Figure S4). The Benjamini-Hochberg method was used for  
477 multiple testing correction.

478         The case-vs-control statistical tests to identify differentially methylated CpG sites  
479 were carried out independently for each F-generation of case samples. However, to control  
480 for any generational epigenetic drift that could add to stochastic noise in the controls, the  
481 same set of all control samples across generations was used for each statistical test, i.e., 3  
482 cases of F1 vs 9 controls (F1+F2+F4), 3 cases of F4 vs 9 controls (F1+F2+F4). Lastly, the  
483 statistical significance of differentially methylated CpG (DMP) sites was adjusted with a 5%  
484 FDR in each test.

485

#### 486 *Identification of transgenerational DMPs*

487 We defined transgenerational DMPs as being CpG sites that have acquired a treatment  
488 induced methylation state in the F1 generation (i.e., differentially methylated in the three F1  
489 samples compared to the nine control samples), and for which methylation states are  
490 consistently maintained in the succeeding F2 and F4 generations (i.e., differentially  
491 methylated in both F2 vs control and F4 vs control). No minimum methylation difference was



492 imposed. Furthermore, the statistical significance of DMP overlap across generations was  
493 obtained using the permutation function *permTest* in the R package *regioneR\_1.20.0* [64] and  
494 resampling randomly from all tested CpGs.

495         To robustly verify that the treatment-induced transgenerational DMPs are stably  
496 inherited across generations and not due to stochastic events, we used two additional  
497 strategies for data analyses. First, we carried out a permutation test by randomly assigning  
498 sample labels. For each selected treatment and control pair, we permuted their sample labels  
499 by shuffling case/control labels (e.g., zinc and control) and generation labels (i.e., F1, F2 and  
500 F4). We carried out 100 permutations of sample labels. After permuting sample labels,  
501 differential analysis was carried out as described above, i.e. 3-vs-9 per generation, with the  
502 same set of 9 “controls” in each generation. The null hypothesis was no association between  
503 CpG methylation and sample labels and we expect that randomly shuffling the sample labels  
504 would fulfil the null hypothesis. By inspecting quantile-quantile (Q-Q) plots (Figure S1 and  
505 S2), we compared the distribution of true labels with that of randomly shuffled labels and  
506 assessed if the former was associated with lower *P*-values and a higher number of  
507 transgenerational DMPs (i.e., significant DMPs shared across the three generations). Since  
508 this strategy does not mitigate the potential bias stemming from using the same set of control  
509 samples (i.e., all nine control samples) in each of the statistical tests, we also adopted a  
510 second strategy of identifying DMPs to exclude the possibility that this non-independence  
511 inflates the number of DMPs. To this end, we selected candidate environmentally induced  
512 CpGs by selecting outliers from comparisons of three cases versus three controls in the F1  
513 generation using a lenient 20% FDR. We then tested these candidate CpGs and asked which  
514 of them also meet the criterion of being differentially methylated at a 5% un-adjusted *P*-value  
515 cut-off in the F2 and F4 generations by performing three cases versus three controls tests  
516 within these two generations. When comparing this alternative set of DMPs against the set

517 obtained using the original 3-vs-9 approach, we found that between 77% and 25% of the  
518 original approach were also identified by the alternative approach (Table S15), with the  
519 alternative approach being generally more stringent (i.e., producing lower numbers of  
520 transgenerational DMPs).

521

#### 522 *Annotation of DMPs and gene ontology analyses*

523 We assigned each DMP to a nearest gene or a gene unit (i.e., exon or intron) by cross-  
524 referencing its genomic position with the GTF annotation from the reference assembly. This  
525 was carried out using BEDOPS closest-feature [65]. To obtain functional annotation such as  
526 gene ontology for the *Daphnia* genome, we used eggnoG 5.0 [66] (emapper-2.1.2) with  
527 default parameters but restricting to the taxon Arthropoda. The enrichment analysis of GO  
528 terms was carried out using the R package topGO (version 2.40.0) and Fisher's exact test.

529

#### 530 *Cross-referencing differentially methylated genes with differentially expressed genes* 531 *identified in the literature*

532 To assess if hypo- or hyper-methylated genes in this study are those demonstrated to be  
533 differentially expressed upon exposure to a given stressor, we systematically screened the  
534 literature for relevant transcriptomic studies. We conducted a literature search using ISI *Web*  
535 *of Science* (v.5.30) with search terms specific to each dataset. We used the search terms  
536 'Daphnia' and 'transcriptomic\*', 'RNAseq', 'gene expression', 'microarray', along with one  
537 of the following: '\*zinc\*', 'microcystin\*', 'temperature\*' or '\*azacytidine\*'. We excluded  
538 studies that used experimental designs that are too dissimilar from our settings (e.g., in terms  
539 of exposure duration). Quantitative comparisons between the set of differentially methylated  
540 genes identified in the present study and differentially expressed genes taken from the  
541 literature is hampered by a number of facts (e.g., differentially expressed genes are not

542 reported in a standardized way, overrepresented GO terms are rarely reported, assigning gene  
543 orthologs between different *Daphnia* species, or assigning corresponding genes between  
544 different genome versions of the same species, is not straightforward). In addition, these  
545 studies often report up to 30% of all transcripts as differentially expressed, which precludes  
546 quantitative enrichment analyses. We therefore restricted our analysis to cross-referencing the  
547 key genes singled out in genome-wide, unbiased approaches against the differentially  
548 methylated genes identified in our study. We manually compared gene sets and regarded  
549 genes as shared when they are semantically highly similar. For example, we considered ‘heat  
550 shock protein 70 Bbb’ similar to ‘heat shock factor protein-like, transcript variant X7’.

551

## 552 **Acknowledgements**

553 We thank Hanna Laakkonen for assistance with DNA extractions and Alexander Hegg for  
554 assistance with *Daphnia* experiments.

555

## 556 **Competing interests**

557 The authors declare no competing interests.

558

## 559 **Financial Disclosure Statement**

560 This work was supported by the John Templeton Foundation (#60501) and the SciLifeLab  
561 Bioinformatics Long-term Support (both to T.U.), the Knut and Alice Wallenberg Foundation  
562 through a Wallenberg Academy Fellowship to T.U., and the European and Swedish Research  
563 Councils through Starting Grants (#948126 and #2020-03650) to N.F. L.V., M.R. and B.N.  
564 were financially supported by the Knut och Alice Wallenbergs Stiftelse as part of the  
565 National Bioinformatics Infrastructure Sweden at SciLifeLab. Sequencing was performed by  
566 the SNP&SEQ Technology Platform, which is part of the National Genomics Infrastructure

567 (NGI) hosted by SciLifeLab in Uppsala, Sweden. NGI is supported by grants from the  
568 Swedish Research Council and the Knut and Alice Wallenberg Foundation. The genomic  
569 analyses were enabled by resources provided by the Swedish National Infrastructure for  
570 Computing (SNIC) at UPPMAX, partially funded by the Swedish Research Council through  
571 grant agreement no. 2018-05973.

572

### 573 **Data availability**

574 All sequences generated in this study have been deposited in NCBI Sequence Read Archive  
575 (SRA) with accession number PRJNA760269. Data for the fitness analyses are deposited in  
576 Dryad (*DOI to be generated during submission*).

577

### 578 **Code availability**

579 Code for the analysis of DNA methylation is available on Bitbucket  
580 ([https://bitbucket.org/scilifelab-lts/t\\_uller\\_1801/](https://bitbucket.org/scilifelab-lts/t_uller_1801/)). Code for the fitness analyses is deposited  
581 in Zenodo (DOI: 10.5281/zenodo.5635792).

582

### 583 **Author contributions**

584 R.R. and T.U. conceived the study; N.F. and T.U. coordinated the study; R.R., E.W.T, B.T.H.  
585 and T.U designed the study; R.R. performed the experiments; A.R. performed optimization of  
586 library preparation and generated the sequencing libraries; L.V. analysed the sequence data  
587 with input from N.F., R.R., M.R., B.N. and T.U.; R.R. analysed fitness data with input from  
588 N.F. and T.U.; N.F. and T.U. wrote the manuscript with input from L.V., R.R., E.W.T and  
589 B.T.H. All authors approved the final manuscript.

590

591

592 **References**

- 593 1. Baugh LR, Day T. Nongenetic inheritance and multigenerational plasticity in the  
594 nematode *C. elegans*. *eLife*. 2020;9:e58498. doi: 10.7554/eLife.58498.
- 595 2. Rechavi O, Hourri-Ze'evi L, Anava S, Goh WSS, Kerk SY, Hannon GJ, et al.  
596 Starvation-induced transgenerational inheritance of small RNAs in *C. elegans*. *Cell*.  
597 2014;158(2):277-87. Epub 2014/07/16. doi: 10.1016/j.cell.2014.06.020. PubMed PMID:  
598 25018105; PubMed Central PMCID: PMC4377509.
- 599 3. Anway MD, Cupp AS, Uzumcu M, Skinner MK. Epigenetic transgenerational actions  
600 of endocrine disruptors and male fertility. *Science*. 2005;308(5727):1466-9. Epub  
601 2005/06/04. doi: 10.1126/science.1108190. PubMed PMID: 15933200.
- 602 4. Horsthemke B. A critical view on transgenerational epigenetic inheritance in humans.  
603 *Nat Commun*. 2018;9(1):2973. doi: 10.1038/s41467-018-05445-5.
- 604 5. Heard E, Martienssen RA. Transgenerational epigenetic inheritance: myths and  
605 mechanisms. *Cell*. 2014;157(1):95-109. Epub 2014/04/01. doi: 10.1016/j.cell.2014.02.045.  
606 PubMed PMID: 24679529; PubMed Central PMCID: PMC4020004.
- 607 6. Radford EJ. Exploring the extent and scope of epigenetic inheritance. *Nature Reviews*  
608 *Endocrinology*. 2018;14(6):345-55. doi: 10.1038/s41574-018-0005-5.
- 609 7. Soley FG. Still no evidence for transgenerational inheritance or absence of epigenetic  
610 reprogramming in the honey bee. *Proceedings of the National Academy of Sciences*.  
611 2021;118(28):e2108608118. doi: 10.1073/pnas.2108608118.
- 612 8. Xia W, Xie W. Rebooting the Epigenomes during Mammalian Early Embryogenesis.  
613 *Stem Cell Reports*. 2020;15(6):1158-75. doi: <https://doi.org/10.1016/j.stemcr.2020.09.005>.
- 614 9. Zheng H, Huang B, Zhang B, Xiang Y, Du Z, Xu Q, et al. Resetting Epigenetic  
615 Memory by Reprogramming of Histone Modifications in Mammals. *Mol Cell*.  
616 2016;63(6):1066-79. doi: <https://doi.org/10.1016/j.molcel.2016.08.032>.

- 617 10. Sales VM, Ferguson-Smith AC, Patti ME. Epigenetic Mechanisms of Transmission of  
618 Metabolic Disease across Generations. *Cell Metab.* 2017;25(3):559-71. Epub 2017/03/09.  
619 doi: 10.1016/j.cmet.2017.02.016. PubMed PMID: 28273478; PubMed Central PMCID:  
620 PMC5404272.
- 621 11. Lyko F, Ramsahoye BH, Jaenisch R. DNA methylation in *Drosophila melanogaster*.  
622 *Nature.* 2000;408(6812):538-40. doi: 10.1038/35046205.
- 623 12. Oppold A, Kress A, Vanden Bussche J, Diogo JB, Kuch U, Oehlmann J, et al.  
624 Epigenetic alterations and decreasing insecticide sensitivity of the Asian tiger mosquito  
625 *Aedes albopictus*. *Ecotoxicol Environ Saf.* 2015;122:45-53. Epub 2015/07/21. doi:  
626 10.1016/j.ecoenv.2015.06.036. PubMed PMID: 26188644.
- 627 13. Mukherjee K, Dubovskiy I, Grizanova E, Lehmann R, Vilcinskas A. Epigenetic  
628 mechanisms mediate the experimental evolution of resistance against parasitic fungi in the  
629 greater wax moth *Galleria mellonella*. *Scientific Reports.* 2019;9(1):1626. doi:  
630 10.1038/s41598-018-36829-8.
- 631 14. Yagound B, Remnant EJ, Buchmann G, Oldroyd BP. Intergenerational transfer of  
632 DNA methylation marks in the honey bee. *Proceedings of the National Academy of Sciences.*  
633 2020;117(51):32519. doi: 10.1073/pnas.2017094117.
- 634 15. Lampert W. *Daphnia: Development of a Model Organism in Ecology and Evolution:*  
635 *International Ecology Institute; 2011.*
- 636 16. Miner BE, De Meester L, Pfrender ME, Lampert W, Hairston NG. Linking genes to  
637 communities and ecosystems: *Daphnia* as an ecogenomic model. *Proceedings of the Royal*  
638 *Society B: Biological Sciences.* 2012;279(1735):1873-82. doi: 10.1098/rspb.2011.2404.
- 639 17. Day T, Bonduriansky R. A unified approach to the evolutionary consequences of  
640 genetic and nongenetic inheritance. *Am Nat.* 2011;178(2):E18-36. Epub 2011/07/14. doi:  
641 10.1086/660911. PubMed PMID: 21750377.

- 642 18. Anastasiadi D, Venney CJ, Bernatchez L, Wellenreuther M. Epigenetic inheritance  
643 and reproductive mode in plants and animals. *Trends Ecol Evol.* 2021;36(12):1124-40. doi:  
644 <https://doi.org/10.1016/j.tree.2021.08.006>.
- 645 19. Adrian-Kalchhauser I, Sultan SE, Shama LNS, Spence-Jones H, Tiso S, Keller  
646 Valsecchi CI, et al. Understanding 'Non-genetic' Inheritance: Insights from Molecular-  
647 Evolutionary Crosstalk. *Trends Ecol Evol.* 2020;35(12):1078-89. Epub 2020/10/11. doi:  
648 10.1016/j.tree.2020.08.011. PubMed PMID: 33036806.
- 649 20. Harris KD, Bartlett NJ, Lloyd VK. *Daphnia* as an emerging epigenetic model  
650 organism. *Genet Res Int.* 2012;2012:147892. Epub 2012/05/09. doi: 10.1155/2012/147892.  
651 PubMed PMID: 22567376; PubMed Central PMCID: PMC3335723.
- 652 21. Dukić M, Berner D, Haag CR, Ebert D. How clonal are clones? A quest for loss of  
653 heterozygosity during asexual reproduction in *Daphnia magna*. *J Evol Biol.* 2019;32(6):619-  
654 28. doi: <https://doi.org/10.1111/jeb.13443>.
- 655 22. Uller T, English S, Pen I. When is incomplete epigenetic resetting in germ cells  
656 favoured by natural selection? *Proc Biol Sci.* 2015;282(1811). Epub 2015/07/03. doi:  
657 10.1098/rspb.2015.0682. PubMed PMID: 26136447; PubMed Central PMCID:  
658 PMC4528548.
- 659 23. McNamara JM, Dall SR, Hammerstein P, Leimar O. Detection vs. selection:  
660 integration of genetic, epigenetic and environmental cues in fluctuating environments. *Ecol*  
661 *Lett.* 2016;19(10):1267-76. Epub 2016/09/08. doi: 10.1111/ele.12663. PubMed PMID:  
662 27600658.
- 663 24. Rivoire O, Leibler S. A model for the generation and transmission of variations in  
664 evolution. *Proceedings of the National Academy of Sciences.* 2014;111(19):E1940. doi:  
665 10.1073/pnas.1323901111.

- 666 25. Sha Y, Tesson SVM, Hansson L-A. Diverging responses to threats across generations  
667 in zooplankton. *Ecology*. 2020;101(11):e03145. doi: <https://doi.org/10.1002/ecy.3145>.
- 668 26. Ortiz-Rodríguez R, Dao TS, Wiegand C. Transgenerational effects of microcystin-LR  
669 on *Daphnia magna*. *J Exp Biol*. 2012;215(16):2795-805. doi: 10.1242/jeb.069211.
- 670 27. Walsh MR, Whittington D, Funkhouser C. Thermal Transgenerational Plasticity in  
671 Natural Populations of *Daphnia*. *Integr Comp Biol*. 2014;54(5):822-9. doi:  
672 10.1093/icb/icu078.
- 673 28. Walsh MR, Castoe T, Holmes J, Packer M, Biles K, Walsh M, et al. Local adaptation  
674 in transgenerational responses to predators. *Proceedings of the Royal Society B: Biological*  
675 *Sciences*. 2016;283(1823):20152271. doi: doi:10.1098/rspb.2015.2271.
- 676 29. Kvist J, Gonçalves Athanásio C, Shams Solari O, Brown JB, Colbourne JK, Pfrender  
677 ME, et al. Pattern of DNA methylation in *Daphnia*: evolutionary perspective. *Genome Biol*  
678 *Evol*. 2018;10(8):1988-2007.
- 679 30. Asselman J, De Coninck DI, Pfrender ME, De Schamphelaere KA. Gene Body  
680 Methylation Patterns in *Daphnia* Are Associated with Gene Family Size. *Genome Biol Evol*.  
681 2016;8(4):1185-96. Epub 2016/03/28. doi: 10.1093/gbe/evw069. PubMed PMID: 27017526;  
682 PubMed Central PMCID: PMC4860698.
- 683 31. Trijau M, Asselman J, Armant O, Adam-Guillermin C, De Schamphelaere KAC,  
684 Alonzo F. Transgenerational DNA Methylation Changes in *Daphnia magna* Exposed to  
685 Chronic gamma Irradiation. *Environ Sci Technol*. 2018;52(7):4331-9. Epub 2018/02/28. doi:  
686 10.1021/acs.est.7b05695. PubMed PMID: 29486114.
- 687 32. Jeremias G, Barbosa J, Marques SM, De Schamphelaere KAC, Van Nieuwerburgh F,  
688 Deforce D, et al. Transgenerational Inheritance of DNA Hypomethylation in *Daphnia magna*  
689 in Response to Salinity Stress. *Environ Sci Technol*. 2018;52(17):10114-23. Epub  
690 2018/08/17. doi: 10.1021/acs.est.8b03225. PubMed PMID: 30113818.



- 691 33. Vandegehuchte MB, Lemiere F, Vanhaecke L, Vanden Berghe W, Janssen CR. Direct  
692 and transgenerational impact on *Daphnia magna* of chemicals with a known effect on DNA  
693 methylation. *Comp Biochem Physiol C Toxicol Pharmacol*. 2010;151(3):278-85. Epub  
694 2009/12/08. doi: 10.1016/j.cbpc.2009.11.007. PubMed PMID: 19961956.
- 695 34. Ghoshal K, Datta J, Majumder S, Bai S, Kutay H, Motiwala T, et al. 5-Aza-  
696 deoxycytidine induces selective degradation of DNA methyltransferase 1 by a proteasomal  
697 pathway that requires the KEN box, bromo-adjacent homology domain, and nuclear  
698 localization signal. *Mol Cell Biol*. 2005;25(11):4727-41. Epub 2005/05/19. doi:  
699 10.1128/MCB.25.11.4727-4741.2005. PubMed PMID: 15899874; PubMed Central PMCID:  
700 PMC1140649.
- 701 35. Lyu K, Gu L, Wang H, Zhu X, Zhang L, Sun Y, et al. Transcriptomic analysis  
702 dissects the mechanistic insight into the *Daphnia* clonal variation in tolerance to toxic  
703 *Microcystis*. *Limnol Oceanogr*. 2019;64(1):272-83. doi: <https://doi.org/10.1002/lno.11038>.
- 704 36. Schwarzenberger A, Sadler T, Motameny S, Ben-Khalifa K, Frommolt P, Altmüller J,  
705 et al. Deciphering the genetic basis of microcystin tolerance. *BMC Genomics*.  
706 2014;15(1):776-. doi: 10.1186/1471-2164-15-776. PubMed PMID: 25199885.
- 707 37. Asselman J, De Coninck DIM, Glaholt S, Colbourne JK, Janssen CR, Shaw JR, et al.  
708 Identification of pathways, gene networks, and paralogous gene families in *Daphnia pulex*  
709 responding to exposure to the toxic cyanobacterium *Microcystis aeruginosa*. *Environ Sci*  
710 *Technol*. 2012;46(15):8448-57. Epub 2012/07/25. doi: 10.1021/es301100j. PubMed PMID:  
711 22799445.
- 712 38. Poynton HC, Lazorchak JM, Impellitteri CA, Smith ME, Rogers K, Patra M, et al.  
713 Differential gene expression in *Daphnia magna* suggests distinct modes of action and  
714 bioavailability for ZnO nanoparticles and Zn ions. *Environ Sci Technol*. 2011;45(2):762-8.  
715 Epub 2010/12/15. doi: 10.1021/es102501z. PubMed PMID: 21142172.

- 716 39. Vandegehuchte MB, Vandenbrouck T, De Coninck D, De Coen WM, Janssen CR.  
717 Can metal stress induce transferable changes in gene transcription in *Daphnia magna*? *Aquat*  
718 *Toxicol.* 2010;97(3):188-95. Epub 2009/08/18. doi: 10.1016/j.aquatox.2009.07.013. PubMed  
719 PMID: 19683351.
- 720 40. Becker D, Reydelet Y, Lopez JA, Jackson C, Colbourne JK, Hawat S, et al. The  
721 transcriptomic and proteomic responses of *Daphnia pulex* to changes in temperature and food  
722 supply comprise environment-specific and clone-specific elements. *BMC Genomics.*  
723 2018;19(1):376. doi: 10.1186/s12864-018-4742-6.
- 724 41. Athanasio CG, Sommer U, Viant MR, Chipman JK, Mirbahai L. Use of 5-azacytidine  
725 in a proof-of-concept study to evaluate the impact of pre-natal and post-natal exposures, as  
726 well as within generation persistent DNA methylation changes in *Daphnia*. *Ecotoxicology.*  
727 2018;27(5):556-68. doi: 10.1007/s10646-018-1927-3.
- 728 42. Lindeman LC, Thaulow J, Song Y, Kamstra JH, Xie L, Asselman J, et al. Epigenetic,  
729 transcriptional and phenotypic responses in two generations of *Daphnia magna* exposed to the  
730 DNA methylation inhibitor 5-azacytidine. *Environ Epigenet.* 2019;5(3):dvz016-dvz. doi:  
731 10.1093/eep/dvz016. PubMed PMID: 31528364.
- 732 43. Moin M, Bakshi A, Saha A, Dutta M, Madhav SM, Kirti PB. Rice Ribosomal Protein  
733 Large Subunit Genes and Their Spatio-temporal and Stress Regulation. *Frontiers in plant*  
734 *science.* 2016;7:1284-. doi: 10.3389/fpls.2016.01284. PubMed PMID: 27605933.
- 735 44. Alkayal F, Albion RL, Tillett RL, Hathwaik LT, Lemos MS, Cushman JC. Expressed  
736 sequence tag (EST) profiling in hyper saline shocked *Dunaliella salina* reveals high  
737 expression of protein synthetic apparatus components. *Plant Sci.* 2010;179(5):437-49. doi:  
738 <https://doi.org/10.1016/j.plantsci.2010.07.001>.

- 739 45. Xiang H, Zhu J, Chen Q, Dai F, Li X, Li M, et al. Single base-resolution methylome  
740 of the silkworm reveals a sparse epigenomic map. *Nat Biotechnol.* 2010;28(5):516-20. doi:  
741 10.1038/nbt.1626.
- 742 46. Sarda S, Zeng J, Hunt BG, Yi SV. The Evolution of Invertebrate Gene Body  
743 Methylation. *Mol Biol Evol.* 2012;29(8):1907-16. doi: 10.1093/molbev/mss062.
- 744 47. Duempelmann L, Skribbe M, Bühler M. Small RNAs in the Transgenerational  
745 Inheritance of Epigenetic Information. *Trends Genet.* 2020;36(3):203-14. Epub 2020/01/19.  
746 doi: 10.1016/j.tig.2019.12.001. PubMed PMID: 31952840.
- 747 48. Hearn J, Chow FW-N, Barton H, Tung M, Wilson PJ, Blaxter M, et al. *Daphnia*  
748 magna microRNAs respond to nutritional stress and ageing but are not transgenerational. *Mol*  
749 *Ecol.* 2018;27(6):1402-12. doi: <https://doi.org/10.1111/mec.14525>.
- 750 49. Hairston NG, Lampert W, Cáceres CE, Holtmeier CL, Weider LJ, Gaedke U, et al.  
751 Rapid evolution revealed by dormant eggs. *Nature.* 1999;401(6752):446-. doi:  
752 10.1038/46731.
- 753 50. Turko P, Sigg L, Hollender J, Spaak P. Rapid evolutionary loss of metal resistance  
754 revealed by hatching decades-old eggs. *Evolution.* 2016;70(2):398-407. doi:  
755 <https://doi.org/10.1111/evo.12859>.
- 756 51. De Meester L, Van Doorslaer W, Geerts A, Orsini L, Stoks R. Thermal Genetic  
757 Adaptation in the Water Flea *Daphnia* and its Impact: An Evolving Metacommunity  
758 Approach. *Integr Comp Biol.* 2011;51(5):703-18. doi: 10.1093/icb/icr027.
- 759 52. Radersma R, Hegg A, Noble DWA, Uller T. Timing of maternal exposure to toxic  
760 cyanobacteria and offspring fitness in *Daphnia magna*: Implications for the evolution of  
761 anticipatory maternal effects. *Ecol Evol.* 2018;8(24):12727-36. Epub 2019/01/09. doi:  
762 10.1002/ece3.4700. PubMed PMID: 30619577; PubMed Central PMCID:  
763 PMC6309005.

- 764 53. Rogalski MA. Tainted resurrection: metal pollution is linked with reduced hatching  
765 and high juvenile mortality in *Daphnia* egg banks. *Ecology*. 2015;96(5):1166-73. doi:  
766 <https://doi.org/10.1890/14-1663.1>.
- 767 54. Garbutt JS, Scholefield JA, Vale PF, Little TJ. Elevated maternal temperature  
768 enhances offspring disease resistance in *Daphnia magna*. *Funct Ecol*. 2014;28(2):424-31. doi:  
769 <https://doi.org/10.1111/1365-2435.12197>.
- 770 55. Tsui MTK, Wang W-X. Maternal transfer efficiency and transgenerational toxicity of  
771 methylmercury in *Daphnia magna*. *Environ Toxicol Chem*. 2004;23(6):1504-11. doi:  
772 <https://doi.org/10.1897/03-310>.
- 773 56. Gustafsson S, Rengefors K, Hansson L-A. Increased consumer fitness following  
774 transfer of toxin tolerance to offspring via maternal effects. *Ecology*. 2005;86(10):2561-7.  
775 doi: <https://doi.org/10.1890/04-1710>.
- 776 57. Mittmann B, Ungerer P, Klann M, Stollewerk A, Wolff C. Development and staging  
777 of the water flea *Daphnia magna* (Straus, 1820; Cladocera, Daphniidae) based on  
778 morphological landmarks. *Evodevo*. 2014;5(1):12. Epub 2014/03/20. doi: 10.1186/2041-  
779 9139-5-12. PubMed PMID: 24641948; PubMed Central PMCID: PMC4108089.
- 780 58. Asselman J, De Coninck DI, Beert E, Janssen CR, Orsini L, Pfrender ME, et al.  
781 Bisulfite Sequencing with *Daphnia* Highlights a Role for Epigenetics in Regulating Stress  
782 Response to *Microcystis* through Preferential Differential Methylation of Serine and  
783 Threonine Amino Acids. *Environ Sci Technol*. 2017;51(2):924-31. Epub 2016/12/17. doi:  
784 [10.1021/acs.est.6b03870](https://doi.org/10.1021/acs.est.6b03870). PubMed PMID: 27983812.
- 785 59. Raine A, Manlig E, Wahlberg P, Syvanen AC, Nordlund J. SPLinted Ligation Adapter  
786 Tagging (SPLAT), a novel library preparation method for whole genome bisulphite  
787 sequencing. *Nucleic Acids Res*. 2017;45(6):e36. Epub 2016/12/03. doi:

- 788 10.1093/nar/gkw1110. PubMed PMID: 27899585; PubMed Central PMCID:  
789 PMCPMC5389478.
- 790 60. Ewels P, Huether P, Hammarén R, Pertz A, mashehu, Alneberg J, et al. nf-  
791 core/methylseq: nf-core/methylseq version 1.5. 1.5 ed: Zenodo; 2020.
- 792 61. Lee BY, Choi BS, Kim MS, Park JC, Jeong CB, Han J, et al. The genome of the  
793 freshwater water flea *Daphnia magna*: A potential use for freshwater molecular  
794 ecotoxicology. *Aquat Toxicol.* 2019;210:69-84. Epub 2019/03/04. doi:  
795 10.1016/j.aquatox.2019.02.009. PubMed PMID: 30826642.
- 796 62. Krueger F, Andrews SR. Bismark: a flexible aligner and methylation caller for  
797 Bisulfite-Seq applications. *Bioinformatics.* 2011;27(11):1571-2. Epub 2011/04/16. doi:  
798 10.1093/bioinformatics/btr167. PubMed PMID: 21493656; PubMed Central PMCID:  
799 PMCPMC3102221.
- 800 63. Akalin A, Kormaksson M, Li S, Garrett-Bakelman FE, Figueroa ME, Melnick A, et  
801 al. methylKit: a comprehensive R package for the analysis of genome-wide DNA methylation  
802 profiles. *Genome Biol.* 2012;13(10):R87. Epub 2012/10/05. doi: 10.1186/gb-2012-13-10-r87.  
803 PubMed PMID: 23034086; PubMed Central PMCID: PMCPMC3491415.
- 804 64. Gel B, Díez-Villanueva A, Serra E, Buschbeck M, Peinado MA, Malinverni R.  
805 regioneR: an R/Bioconductor package for the association analysis of genomic regions based  
806 on permutation tests. *Bioinformatics.* 2016;32(2):289-91. Epub 2015/10/02. doi:  
807 10.1093/bioinformatics/btv562. PubMed PMID: 26424858; PubMed Central PMCID:  
808 PMCPMC4708104.
- 809 65. Neph S, Kuehn MS, Reynolds AP, Haugen E, Thurman RE, Johnson AK, et al.  
810 BEDOPS: high-performance genomic feature operations. *Bioinformatics.* 2012;28(14):1919-  
811 20. Epub 2012/05/12. doi: 10.1093/bioinformatics/bts277. PubMed PMID: 22576172;  
812 PubMed Central PMCID: PMCPMC3389768.

813 66. Huerta-Cepas J, Szklarczyk D, Heller D, Hernández-Plaza A, Forslund SK, Cook H,  
814 et al. eggNOG 5.0: a hierarchical, functionally and phylogenetically annotated orthology  
815 resource based on 5090 organisms and 2502 viruses. *Nucleic Acids Res.* 2019;47(D1):D309-  
816 d14. Epub 2018/11/13. doi: 10.1093/nar/gky1085. PubMed PMID: 30418610; PubMed  
817 Central PMCID: PMC6324079.

818
